# Supplementary material for: The structural analysis of MARK4 and the exploration of specific inhibitors for the MARK family: a computational approach to obstruct the role of MARK4 in prostate cancer progression
Source: Royal Society of Chemistry journal article supplement (doi:10.1039/c3mb70591a), 2014-03-05
Supplement: c3mb70591a1.pdf [file c3mb70591a1.pdf]

## Electronic Supplementary Information

**Fig. S1:** (A-B). Ramachandran Plot results of predicted and simulated models respectively. (C) Verify 3D Analysis of Predicted and Simulated model of MARK4 Structure.

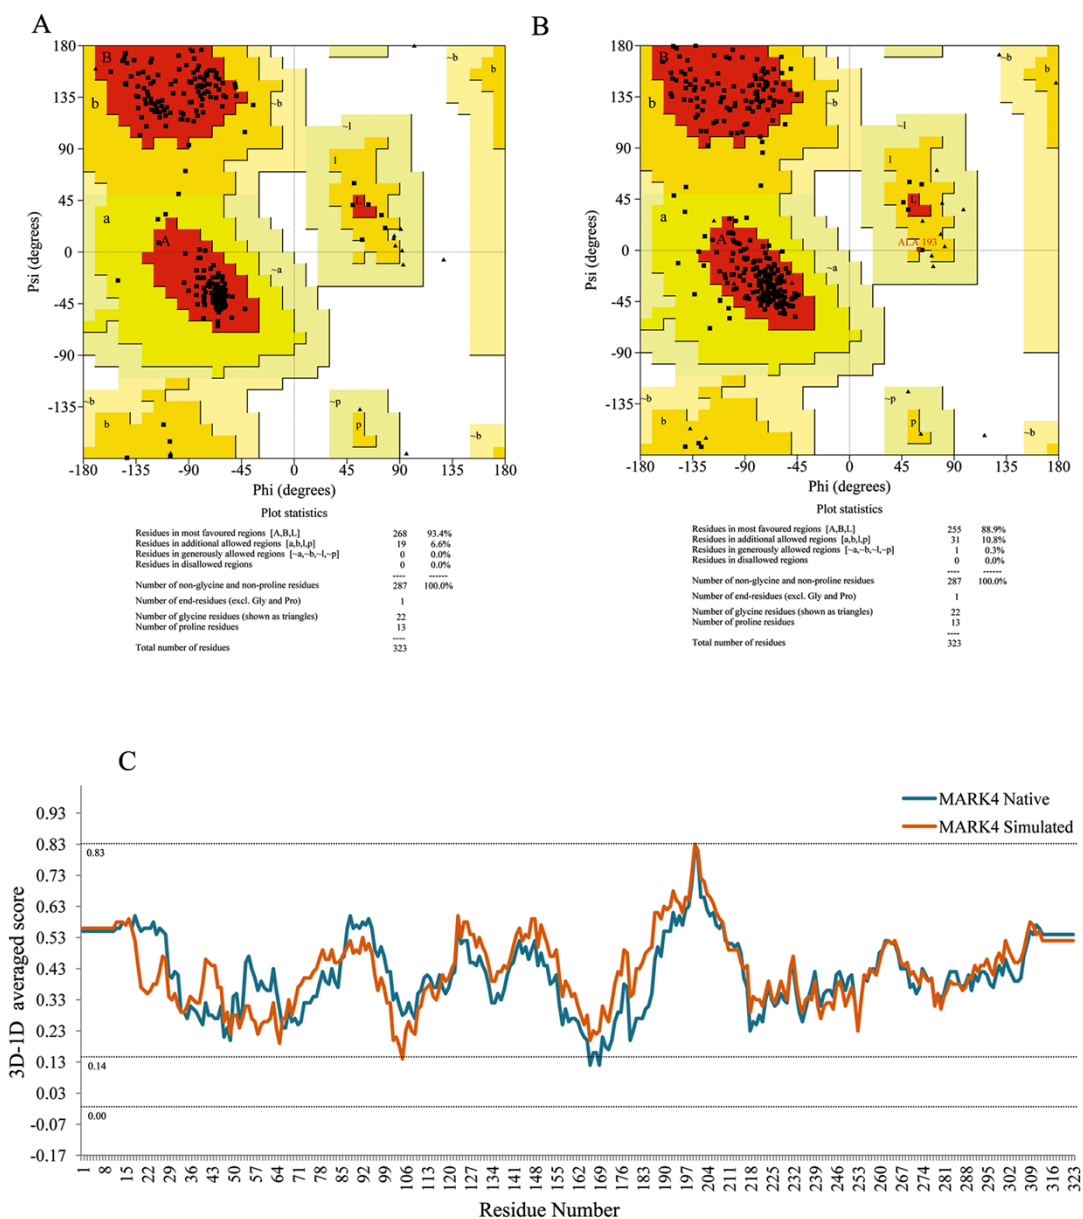

**Fig. S2:** Binding mode analysis of known MARK2 inhibitors. (A) Known inhibitors (9-Oxo-derivatives) docked into the ATP-binding pocket of MARK2 kinase domain (PDB ID: 2WZJ\_A). The protein is represented as cartoon (N-lobe: yellow; P-loop: red; Hinge: Magenta; C-loop: blue; T-loop: green; C-Lobe: light green; UBA domain: Light Blue) and the binding pocket is shown in surface representation (grey). (B-E) shows interactions of 9-oxo-derivatives-30195 (blue), 30197 (magenta), 30199 (sand) and 30019 (green) with MARK2 respectively. Ligands and interacting residues are displayed in stick representation. Hydrogen bonds are denoted as black dotted lines; Pi-Pi ( $\Pi$ - $\Pi$ ) interactions in orange, Pi-Sigma ( $\Pi$ - $\sigma$ ) in brown and Pi-Cation ( $\Pi$ -cat<sup>+</sup>) in green dotted lines. The centroid of aromatic rings in Pi- interactions are displayed as red spheres. Bond distance in Angstrom ( $\text{\AA}$ ) units.

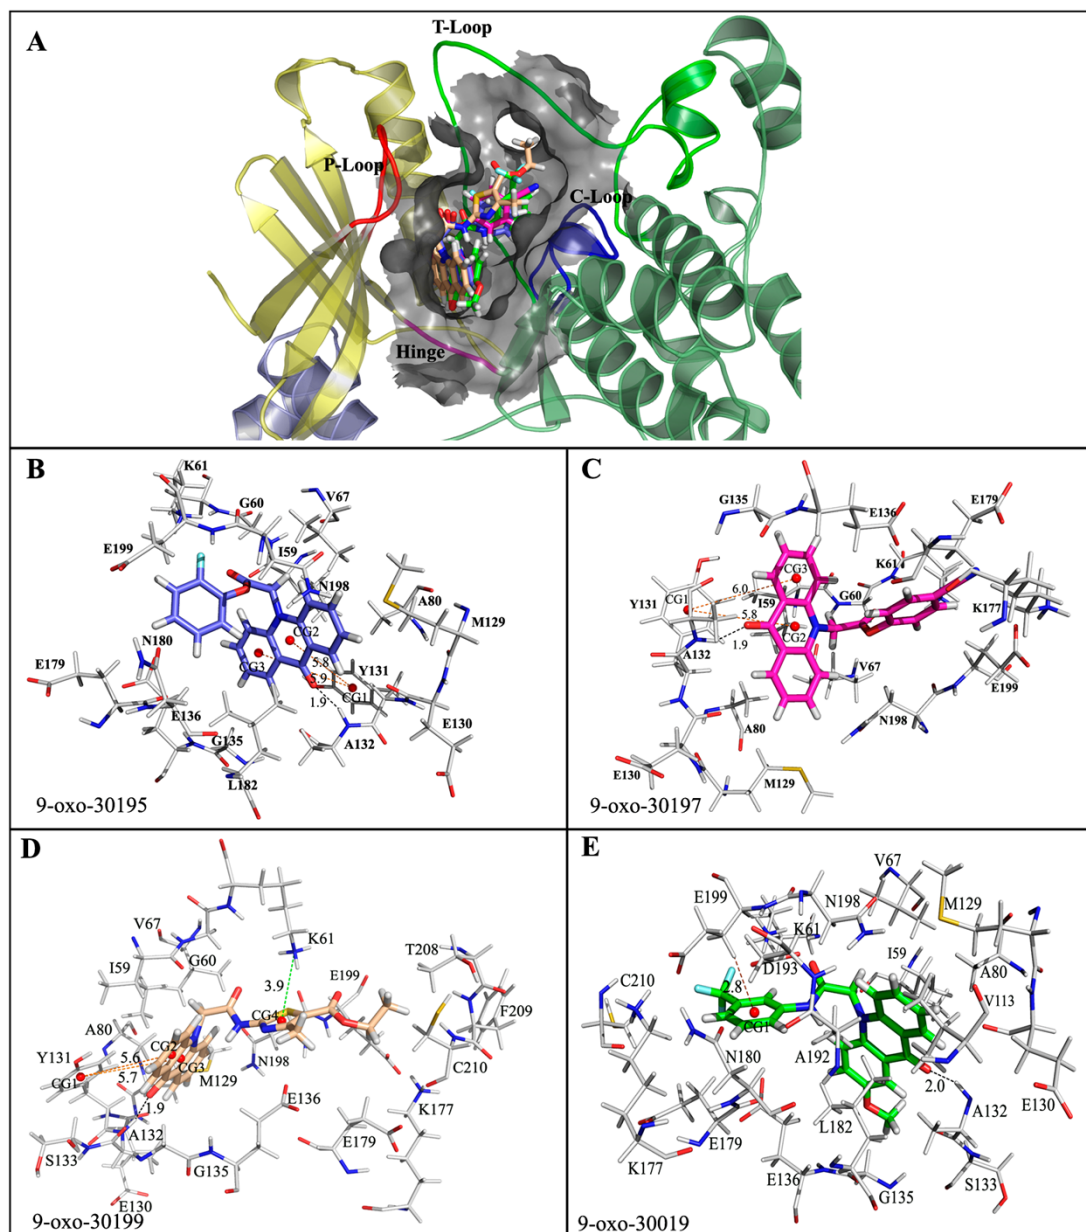

**Supplementary Table 1:** Relative MM-GBSA ligand binding free energies of the compounds bound to MARK4

| S. No.                                               | Compound/<br>Ligand name | Prime MM-GBSA<br>Complex Energy<br>Kcal/mol | Prime MM-GBSA<br>Binding Energy<br>Kcal/mol |
|------------------------------------------------------|--------------------------|---------------------------------------------|---------------------------------------------|
| <b>MARK4 with 9-oxo-9H-acridin-10-yl derivatives</b> |                          |                                             |                                             |
| 1.                                                   | 9-oxo-30199              | -13776.985                                  | -81.466                                     |
| 2.                                                   | 9-oxo-30197              | -13713.385                                  | -57.549                                     |
| 3.                                                   | 9-oxo-30195              | -13719.804                                  | -62.063                                     |
| 4.                                                   | 9-oxo-30019              | -13741.663                                  | -61.130                                     |
| <b>MARK4 with identified hits</b>                    |                          |                                             |                                             |
| 5.                                                   | 411                      | -13686.420                                  | -67.611                                     |
| 6.                                                   | 214                      | -13766.836                                  | -81.283                                     |
| 7.                                                   | 950                      | -13751.092                                  | -86.846                                     |
| 8.                                                   | 389                      | -13718.303                                  | -61.013                                     |
| 9.                                                   | 781                      | -13734.528                                  | -70.569                                     |
| 10.                                                  | 529                      | -13750.571                                  | -58.227                                     |

**Supplementary Table 2:** Details the changes observed in interaction during the MD simulation of MARK4 complex with top-scoring hits.

| S.No | Time Interval    | Hydrogen Bond Interactions                             |                      | Pi Interactions     |      |              |
|------|------------------|--------------------------------------------------------|----------------------|---------------------|------|--------------|
|      |                  | Donor-Acceptor                                         | Dist. (Å)            | Residues            | Type | Dist. (Å)    |
| 1    | <b>MARK4-411</b> |                                                        |                      |                     |      |              |
|      | 1 ns             | A138:H-UNK:O3<br>A138:H -UNK:O7                        | 1.69<br>2.36         | F202                | Π-Π  | 4.65         |
|      | 2 ns             | -Nil-                                                  |                      |                     |      |              |
|      | 3 ns             | A138:H-UNK:O3                                          | 1.89                 | -Nil-               |      |              |
|      | 4 ns             | A138:H-UNK:O3<br>UNK:H7 -E136:O                        | 1.97<br>2.16         | L188:CD2            | Π-σ  | 3.92         |
|      | 5 ns             | A138:H -UNK:O3                                         | 1.91                 | V73:CG1<br>L188:CD1 | Π-σ  | 3.96<br>3.60 |
|      | 6 ns             | A138:H -UNK:O3                                         | 2.05                 | L188:CD2            | Π-σ  | 3.72         |
|      | 7 ns             | A138:H - UNK:O3<br>UNK373:H7-E136:O                    | 1.78<br>2.44         | -Nil-               |      |              |
|      | 8 ns             | K88:HZ2 - UNK:O5<br>A138:H - UNK:O3<br>UNK:O4 - M110:O | 1.97<br>2.43<br>2.56 | -Nil-               |      |              |
|      | 9 ns             | A138:H - UNK:O3<br>UNK:O4 - M110:O                     | 1.86<br>3.03         | -Nil-               |      |              |
|      | 10 ns            | A138:H - UNK:O3                                        | 2.09                 | -Nil-               |      |              |
| 2    | <b>MARK4-214</b> |                                                        |                      |                     |      |              |
|      | 1 ns             | -Nil-                                                  |                      | Y137                | Π-Π  | 4.31         |
|      | 2 ns             | UNK:H2 - I65:O                                         | 2.19                 | Y137                | Π-Π  | 4.32         |
|      | 3 ns             | -Nil-                                                  |                      | Y137                | Π-Π  | 4.62         |

|   |                  |                                                         |                      |                                                    |                                       |                                      |
|---|------------------|---------------------------------------------------------|----------------------|----------------------------------------------------|---------------------------------------|--------------------------------------|
|   | 4 ns             | A138:H - UNK:O1                                         | 2.24                 | -Nil-                                              |                                       |                                      |
|   | 5 ns             | A138:H - UNK:O1                                         | 1.95                 | V119                                               | Π-σ                                   | 3.42                                 |
|   | 6 ns             | A138:H - UNK:O1                                         | 2.25                 | -Nil-                                              |                                       |                                      |
|   | 7 ns             | A138:H - UNK:O1                                         | 2.36                 | -Nil-                                              |                                       |                                      |
|   | 8 ns             | A138:H - UNK:O1                                         |                      | Y137<br>M135                                       | Π-Π<br>Π-σ                            | 5.80<br>3.99                         |
|   | 9 ns             | A138:H - UNK:O1                                         | 1.94                 | F202                                               | Π-Π                                   | 5.50                                 |
|   | 10 ns            | A138:H - UNK:O1                                         | 2.20                 | -Nil-                                              |                                       |                                      |
| 3 | <b>MARK4-950</b> |                                                         |                      |                                                    |                                       |                                      |
|   | 1 ns             | -Nil-                                                   |                      |                                                    |                                       |                                      |
|   | 2 ns             | K88:HZ1 - UNK:O2                                        | 1.94                 | -Nil-                                              |                                       |                                      |
|   | 3 ns             | K88:HZ1 - UNK:O2<br>A138:H - UNK:N4                     | 2.01<br>2.33         | -Nil-                                              |                                       |                                      |
|   | 4 ns             | K88:HZ1 - UNK:N5                                        | 1.99                 | -Nil-                                              |                                       |                                      |
|   | 5 ns             | K88:HZ3 - UNK:O2                                        | 2.04                 | F202                                               | Π-Π                                   | 4.19                                 |
|   | 6 ns             | -Nil-                                                   |                      | F202                                               | Π-Π                                   | 4.16                                 |
|   | 7 ns             | K88:HZ3 - UNK:O2                                        | 2.03                 | -Nil-                                              |                                       |                                      |
|   | 8 ns             | K88:HZ1 - UNK:O2                                        | 2.36                 | F202                                               | Π-Π                                   | 4.25                                 |
|   | 9 ns             | K88:HZ2 - UNK:O2                                        | 2.09                 | -Nil-                                              |                                       |                                      |
|   | 10 ns            | K88:HZ1 - UNK:N5<br>K88:HZ3 - UNK:O3<br>A138:H - UNK:N4 | 2.40<br>2.25<br>2.25 | -Nil-                                              |                                       |                                      |
| 4 | <b>MARK4-389</b> |                                                         |                      |                                                    |                                       |                                      |
|   | 1 ns             | -Nil-                                                   |                      | K88:NZ<br>K88:NZ<br>A198:CB                        | Π-cat+<br>Π-cat+<br>Π-σ               | 4.39<br>3.12<br>3.93                 |
|   | 2 ns             | A138:H - UNK:N5                                         | 2.27                 | K88:NZ<br>K88:NZ<br>Y137:CA<br>L188:CD1<br>A198:CB | Π-cat+<br>Π-cat+<br>Π-σ<br>Π-σ<br>Π-σ | 4.47<br>3.48<br>3.85<br>3.86<br>3.78 |
|   | 3 ns             | A138:H - UNK:N5                                         | 2.35                 | K88:NZ<br>K88:NZ<br>Y137:CA<br>M110:CG             | Π-cat+<br>Π-cat+<br>Π-σ<br>Π-σ        | 4.96<br>2.96<br>3.78<br>3.92         |
|   | 4 ns             | A138:H - UNK:N5                                         | 2.01                 | K88:NZ<br>K88:NZ<br>Y137:CA                        | Π-cat+<br>Π-cat+<br>Π-σ               | 4.41<br>2.92<br>3.85                 |
|   | 5 ns             | A138:H - UNK:N5                                         | 2.18                 | K88:NZ<br>Y137<br>Y137                             | Π-cat+<br>Π-Π<br>Π-Π                  | 3.15<br>4.28<br>4.78                 |
|   | 6 ns             | A138:H - UNK:N5                                         | 2.00                 | K88:NZ<br>K88:NZ                                   | Π-cat+<br>Π-cat+                      | 5.50<br>3.69                         |
|   | 7 ns             | A138:H - UNK:N5                                         | 2.11                 | K88:NZ<br>K88:NZ<br>Y137:CA                        | Π-cat+<br>Π-cat+<br>Π-σ               | 4.62<br>2.96<br>3.68                 |
|   | 8 ns             | A138:H - UNK:N5                                         | 2.06                 | K88:NZ<br>K88:NZ<br>Y137<br>Y137                   | Π-cat+<br>Π-cat+<br>Π-Π<br>Π-Π        | 5.22<br>3.21<br>5.52<br>5.64         |

|                  |                  |                   |                    |                                                |                                       |                                      |
|------------------|------------------|-------------------|--------------------|------------------------------------------------|---------------------------------------|--------------------------------------|
|                  | 9 ns             | A138:H - UNK:N5   | 2.04               | K88:NZ<br>K88:NZ<br>Y137<br>Y137:CA<br>A198:CB | Π-cat+<br>Π-cat+<br>Π-Π<br>Π-σ<br>Π-σ | 4.16<br>3.25<br>4.55<br>3.99<br>3.66 |
|                  | 10 ns            | A138:H - UNK:N5   | 2.01               | K88:NZ<br>K88:NZ                               | Π-cat+<br>Π-cat+                      | 4.46<br>2.92                         |
| 5                | <b>MARK4-781</b> |                   |                    |                                                |                                       |                                      |
|                  | 1 ns             | K88:HZ3 - UNK:N40 | 2.10               | -Nil-                                          |                                       |                                      |
|                  |                  | A138:H - UNK:O18  | 2.42               |                                                |                                       |                                      |
|                  |                  | D199:H - UNK:N6   | 2.43               |                                                |                                       |                                      |
|                  | 2 ns             | D199:H - UNK:N6   | 2.26               | F202                                           | Π-Π                                   | 4.22                                 |
|                  | 3 ns             | -Nil-             |                    |                                                |                                       |                                      |
|                  | 4 ns             | -Nil-             |                    |                                                |                                       |                                      |
|                  | 5 ns             | A138:H - UNK:O18  | 1.84               | F202                                           | Π-Π                                   | 4.13                                 |
|                  | 6 ns             | A138:H - UNK:O18  | 1.98               | -Nil-                                          |                                       |                                      |
|                  | 7 ns             | A138:H - UNK:O18  | 2.12               | -Nil-                                          |                                       |                                      |
|                  |                  | D199:H - UNK:N6   | 2.43               |                                                |                                       |                                      |
|                  | 8 ns             | A138:H - UNK:O18  | 2.35               | F202<br>A198:CA                                | Π-Π<br>Π-cat+                         | 4.66<br>3.94                         |
| 1.88             |                  |                   | F202               | Π-Π                                            | 3.97                                  |                                      |
| 9 ns             | A138:H - UNK:O18 | 2.21              | -Nil-              |                                                |                                       |                                      |
|                  | D199:H - UNK:N6  | 2.21              | -Nil-              |                                                |                                       |                                      |
| 10 ns            | A138:H - UNK:O18 | 2.37              | K88:NZ             | Π-cat+                                         | 5.20                                  |                                      |
| 6                | <b>MARK4-529</b> |                   |                    |                                                |                                       |                                      |
|                  | 1 ns             | -Nil-             |                    | K88:NZ<br>Y137                                 | Π-cat+<br>Π-Π                         | 4.56<br>5.39                         |
|                  |                  |                   |                    | R63:NH1<br>Y137<br>I65:CG1                     | Π-cat+<br>Π-Π<br>Π-σ                  | 4.08<br>4.77<br>3.41                 |
|                  | 2 ns             | -Nil-             |                    | R63:NH2<br>R63:NH1<br>Y137<br>Y137             | Π-cat+<br>Π-cat+<br>Π-Π<br>Π-Π        | 4.20<br>3.37<br>4.73<br>3.79         |
|                  |                  |                   |                    | R63:NH1<br>K88:NZ<br>Y137                      | Π-cat+<br>Π-cat+<br>Π-Π               | 4.87<br>6.07<br>5.48                 |
|                  | 3 ns             | -Nil-             |                    | R63:NH1<br>R63:NH2<br>Y137<br>L75:CB           | Π-cat+<br>Π-cat+<br>Π-Π<br>Π-σ        | 4.22<br>5.45<br>6.09<br>3.91         |
|                  |                  |                   |                    | R63:NH1<br>R63:NH2<br>Y137                     | Π-cat+<br>Π-cat+<br>Π-Π               | 4.50<br>5.71<br>5.61                 |
|                  | 4 ns             | -Nil-             |                    | R63:NH2<br>R63:NH1                             | Π-cat+<br>Π-cat+                      | 5.61<br>4.59                         |
|                  |                  |                   |                    | -Nil-                                          |                                       |                                      |
|                  | 5 ns             | -Nil-             |                    | R63:NH1<br>R63:NH2                             | Π-cat+<br>Π-cat+                      | 5.98<br>4.87                         |
|                  |                  |                   |                    | R63:NH1<br>R63:NH2<br>Y137                     | Π-cat+<br>Π-cat+<br>Π-Π               | 4.87<br>5.14<br>5.14                 |
|                  | 6 ns             | -Nil-             |                    | R63:NH1<br>R63:NH2                             | Π-cat+<br>Π-cat+                      | 5.98<br>4.87                         |
| D199:H - UNK:O14 |                  |                   |                    | 2.34                                           | R63:NH1                               | Π-cat+                               |
| 7 ns             | -Nil-            |                   | R63:NH1<br>R63:NH2 | Π-cat+<br>Π-cat+                               | 5.98<br>4.87                          |                                      |
| 8 ns             | -Nil-            |                   |                    |                                                |                                       |                                      |
| 9 ns             | -Nil-            |                   | R63:NH1<br>R63:NH2 | Π-cat+<br>Π-cat+                               | 5.98<br>4.87                          |                                      |
| 10 ns            | D199:H - UNK:O14 | 2.34              | R63:NH1            | Π-cat+                                         | 5.14                                  |                                      |
